# Supplementary material for: Associations of falls and severe falls with blood pressure and frailty among Chinese community-dwelling oldest olds: The Chinese Longitudinal Health and Longevity Study
Source: PubMed Central journal article supplement (PMC8266320; doi:10.18632/aging.203174), 2021-06-23
Supplement: aging-13-203174-s001.pdf [file aging-13-203174-s001.pdf]

## SUPPLEMENTARY FIGURE

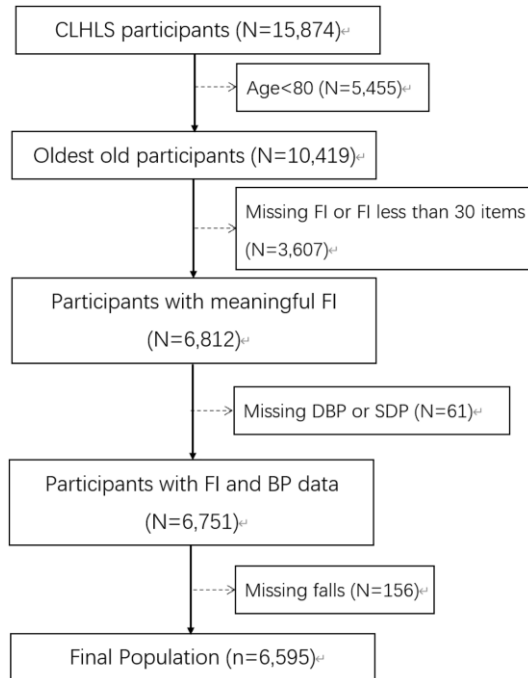

**Supplementary Figure 1. Exclusion criteria for CLHLS analysis linked falls analysis.**
