# Supplementary material for: Associations of falls and severe falls with blood pressure and frailty among Chinese community-dwelling oldest olds: The Chinese Longitudinal Health and Longevity Study
Source: publisher site journal article supplement (doi:10.18632/aging.203174), 2021-06-23
Supplement: Supplementary file [file aging-v13i12-203174-supplementary-material-SD2.pdf]

## SUPPLEMENTARY TABLES

**Supplementary Table 1. Variables used to construct the frailty index.**

| Variables                                                               | Data Type   | Cut-off point                                                                                                                                             |
|-------------------------------------------------------------------------|-------------|-----------------------------------------------------------------------------------------------------------------------------------------------------------|
| 1 Self-reported health                                                  | Ordinal     | V. good = 0, good = 0.25; so so = 0.5, bad = 0.75, very bad = 1                                                                                           |
| 2 Feel fearful or anxious                                               | Ordinal     | Always = 1, often = 0.75, sometimes = 0.5, seldom = 0.25, rarely or never = 0                                                                             |
| 3 Feel useless with age                                                 | Ordinal     | Always = 1, often = 0.75, sometimes = 0.5, seldom = 0.25, rarely or never = 0                                                                             |
| 4 Bathing                                                               | Ordinal     | Without assistance = 0, one part assistance = 0.5, more than one part assistance = 1                                                                      |
| 5 Dressing                                                              | Ordinal     | Without assistance = 0, one part assistance = 0.5, more than one part assistance = 1                                                                      |
| 6 Toileting                                                             | Ordinal     | Without assistance = 0, one part assistance = 0.5, more than one part assistance = 1                                                                      |
| 7 Transferring                                                          | Ordinal     | Without assistance = 0, one part assistance = 0.5, more than one part assistance = 1                                                                      |
| 8 Continence                                                            | Ordinal     | Without assistance = 0, one part assistance = 0.5, more than one part assistance = 1                                                                      |
| 9 Feeding                                                               | Ordinal     | Without assistance = 0, one part assistance = 0.5, more than one part assistance = 1                                                                      |
| 10 Visual function                                                      | Ordinal     | Can see and distinguish = 0, can see only = 0.5, can't see = 1, blind = 1                                                                                 |
| 11 Rhythm of heart                                                      | Binary      | > = 80bpm = 1; <80bpm = 0                                                                                                                                 |
| 12 Hand behind neck                                                     | Ordinal     | Both hands = 0, left hand = 0.5, right hand = 0.5, neither hand = 1                                                                                       |
| 13 Hand behind lower back                                               | Ordinal     | Both hands = 0, left hand = 0.5, right hand = 0.5, neither hand = 1                                                                                       |
| 14 Able to stand up from sitting                                        | Ordinal     | Yes, without using hands = 0, Yes, using hands = 0.5, no = 1                                                                                              |
| 15 Able to pick up a book from the floor                                | Ordinal     | Yes, standing = 0, Yes, sitting = 0.5, no = 1                                                                                                             |
| 16 Number of times suffering from serious illness in the past two years | Ordinal     | Yes = 2, no = 0                                                                                                                                           |
| 17 Hypertension                                                         | Binary      | Yes = 1, no = 0                                                                                                                                           |
| 18 Diabetes                                                             | Binary      | Yes = 1, no = 0                                                                                                                                           |
| 19 Heart disease                                                        | Binary      | Yes = 1, no = 0                                                                                                                                           |
| 20 Stroke or CVD                                                        | Binary      | Yes = 1, no = 0                                                                                                                                           |
| 21 Bronchitis, emphysema, pneumonia, asthma                             | Binary      | Yes = 1, no = 0                                                                                                                                           |
| 22 Tuberculosis                                                         | Binary      | Yes = 1, no = 0                                                                                                                                           |
| 23 Cancer                                                               | Binary      | Yes = 1, no = 0                                                                                                                                           |
| 24 Gastric or duodenal ulcer                                            | Binary      | Yes = 1, no = 0                                                                                                                                           |
| 25 Parkinson                                                            | Binary      | Yes = 1, no = 0                                                                                                                                           |
| 26 Bedsore                                                              | Binary      | Yes = 1, no = 0                                                                                                                                           |
| 27 Able to hear                                                         | Binary      | Yes = 1, no = 0                                                                                                                                           |
| 28 Interviewer rated health                                             | Ordinal     | Surprisingly healthy = 0, relatively healthy = 0, moderately ill = 0.5, very ill = 1                                                                      |
| 29 Look on the bright side of things                                    | Ordinal     | Always = 0, often = 0.25, sometimes = 0.5, seldom = 0.75, rarely or never = 1                                                                             |
| 30 Keep my belongings neat and clean                                    | Ordinal     | Always = 0, often = 0.25, sometimes = 0.5, seldom = 0.75, rarely or never = 1                                                                             |
| 31 Make own decisions                                                   | Ordinal     | Always = 0, often = 0.25, sometimes = 0.5, seldom = 0.75, rarely or never = 1                                                                             |
| 32 Housework at present                                                 | Ordinal     | Almost everyday = 0, not daily, but once for a week = 0.25, not weekly, but at least once for a month = 0.5, not monthly, but sometimes = 0.75, never = 1 |
| 33 Able to use chopsticks to eat                                        | Ordinal     | Yes = 1, no = 0                                                                                                                                           |
| 34 Number of steps used to turn around a 360 degree turn without help   | Interval    | > = 6 steps = 1, <6 steps = 0                                                                                                                             |
| 35 Cataract                                                             | Binary      | Yes = 1, no = 0                                                                                                                                           |
| 36 Glaucoma                                                             | Binary      | Yes = 1, no = 0                                                                                                                                           |
| 37 Other chronic disease                                                | Categorical | Yes = 1, no = 0                                                                                                                                           |
| 38 Prostate Tumor                                                       | Binary      | Yes = 1, no = 0                                                                                                                                           |

**Supplementary Table 2. Characteristics of CLHLS (Chinese Longitudinal Healthy Longevity Survey) participants  $\geq 80$  years of age by systolic blood pressure.**

| Characteristic                                            | Systolic Blood Pressure, mmHg |                              |                                |                                |                                   |
|-----------------------------------------------------------|-------------------------------|------------------------------|--------------------------------|--------------------------------|-----------------------------------|
|                                                           | <110<br>( <i>n</i> = 316)     | 110–119<br>( <i>n</i> = 557) | 120–129<br>( <i>n</i> = 1,133) | 130–139<br>( <i>n</i> = 1,510) | $\geq 140$<br>( <i>n</i> = 3,079) |
| *** Age, years, mean (SD)                                 | 93.0 (7.7)                    | 91.4 (7.4)                   | 91.3 (7.5)                     | 90.3 (7.4)                     | 90.8 (7.5)                        |
| *** Female, [ <i>n</i> (%)]                               | 179 (56.6)                    | 297 (53.3)                   | 616 (54.4)                     | 799 (52.9)                     | 1,810 (58.8)                      |
| * Marital status                                          | 73 (23.1)                     | 148 (26.6)                   | 272 (24.0)                     | 439 (29.1)                     | 767 (24.9)                        |
| Currently married and living with spouse, [ <i>n</i> (%)] |                               |                              |                                |                                |                                   |
| ** Education years, <11 years, [ <i>n</i> (%)]            | 253 (80.1)                    | 448 (80.4)                   | 917 (80.9)                     | 1,237 (81.9)                   | 2,395 (77.8)                      |
| *** Current smoker, [ <i>n</i> (%)]                       | 60 (19.0)                     | 90 (16.2)                    | 157 (13.9)                     | 211 (14.0)                     | 366 (11.9)                        |
| * Current drinker, [ <i>n</i> (%)]                        | 42 (13.3)                     | 76 (13.6)                    | 144 (12.7)                     | 239 (15.8)                     | 369 (12.0)                        |
| *** SBP, mmHg, mean (SD)                                  | 101.1 (7.2)                   | 114.5 (3.1)                  | 124.4 (3.1)                    | 134.1 (3.1)                    | 158.1 (16.6)                      |
| *** DBP, mmHg, mean (SD)                                  | 64.0 (7.9)                    | 70.2 (7.8)                   | 74.5 (7.9)                     | 77.7 (8.6)                     | 84.1 (11.6)                       |
| *** BMI categories, [ <i>n</i> (%)]                       |                               |                              |                                |                                |                                   |
| Underweight                                               | 138 (43.7)                    | 170 (30.5)                   | 294 (25.9)                     | 317 (21.0)                     | 605 (19.6)                        |
| Normal                                                    | 152 (48.1)                    | 324 (58.2)                   | 655 (57.8)                     | 917 (60.7)                     | 1,836 (59.6)                      |
| Overweight                                                | 16 (5.1)                      | 47 (8.4)                     | 141 (12.4)                     | 198 (13.1)                     | 521 (16.9)                        |
| Obesity                                                   | 10 (3.2)                      | 16 (2.9)                     | 43 (3.8)                       | 78 (5.2)                       | 117 (3.8)                         |
| Frailty index, mean (SD)                                  | 0.2 (0.1)                     | 0.2 (0.1)                    | 0.2 (0.1)                      | 0.2 (0.1)                      | 0.2 (0.1)                         |
| History of Falls, [ <i>n</i> (%)]                         | 73 (23.1)                     | 141 (25.3)                   | 261 (23.0)                     | 370 (24.5)                     | 748 (24.3)                        |
| History of Severe falls, [ <i>n</i> (%)]                  | 31 (9.8)                      | 42 (7.5)                     | 99 (8.7)                       | 130 (8.6)                      | 249 (8.1)                         |

Abbreviations: SD: Standard Deviation; SBP: Systolic Blood Pressure; DBP: Diastolic Blood Pressure; BMI: Body mass index.

\* $P < 0.05$ ; \*\* $P < 0.01$ ; \*\*\* $P < 0.001$

**Supplementary Table 3. Characteristics of CLHLS (Chinese Longitudinal Healthy Longevity Survey) participants  $\geq 80$  years of age by diastolic blood pressure.**

| Characteristic                                    | Diastolic Blood Pressure, mmHg |                    |                      |                      |                          |
|---------------------------------------------------|--------------------------------|--------------------|----------------------|----------------------|--------------------------|
|                                                   | <60<br>(n = 196)               | 60–69<br>(n = 909) | 70–79<br>(n = 2,040) | 80–89<br>(n = 2,207) | $\geq 90$<br>(n = 1,243) |
| *** Age, years, mean (SD)                         | 93.3 (7.7)                     | 91.9 (7.4)         | 90.6 (7.3)           | 90.9 (7.6)           | 90.6 (7.5)               |
| ** Female, [n (%)]                                | 108 (55.1)                     | 514 (56.5)         | 1100 (53.9)          | 1229 (55.7)          | 750 (60.3)               |
| ** Marital status                                 |                                |                    |                      |                      |                          |
| Currently married and living with spouse, [n (%)] | 35 (17.9)                      | 229 (25.2)         | 575 (28.2)           | 562 (25.5)           | 299 (24.1)               |
| *** Education years, <11 years, [n (%)]           | 158 (80.6)                     | 733 (80.6)         | 1,613 (79.1)         | 1,775 (80.4)         | 972 (78.2)               |
| * Current smoker, [n (%)]                         | 40 (20.4)                      | 138 (15.2)         | 270 (13.2)           | 280 (12.7)           | 156 (12.6)               |
| Current drinker, [n (%)]                          | 25 (12.8)                      | 122 (13.4)         | 265 (13.0)           | 310 (14.0)           | 149 (12.0)               |
| *** SBP, mmHg, mean (SD)                          | 119.8 (21.9)                   | 126.2 (18.6)       | 134.7 (17.4)         | 141.9 (17.0)         | 160.6 (21.2)             |
| *** DBP, mmHg, mean (SD)                          | 54.1 (4.4)                     | 64.0 (2.8)         | 73.5 (3.0)           | 82.6 (2.8)           | 95.5 (7.5)               |
| *** BMI categories, [n (%)]                       |                                |                    |                      |                      |                          |
| Underweight                                       | 83 (42.3)                      | 246 (27.1)         | 459 (22.5)           | 493 (22.3)           | 243 (19.5)               |
| Normal                                            | 87 (44.4)                      | 534 (58.7)         | 1,246 (61.1)         | 1,288 (58.4)         | 729 (58.7)               |
| Overweight                                        | 17 (8.7)                       | 100 (11.0)         | 264 (12.9)           | 328 (14.9)           | 214 (17.2)               |
| Obesity                                           | 9 (4.6)                        | 29 (3.2)           | 71 (3.5)             | 98 (4.4)             | 57 (4.6)                 |
| Frailty index, mean (SD)                          | 0.2 (0.1)                      | 0.2 (0.1)          | 0.2 (0.1)            | 0.2 (0.1)            | 0.2 (0.1)                |
| History of Falls, [n (%)]                         | 50 (25.5)                      | 252 (27.7)         | 480 (23.5)           | 525 (23.8)           | 286 (23.0)               |
| History of Severe falls, [n (%)]                  | 17 (8.7)                       | 77 (8.5)           | 174 (8.5)            | 179 (8.1)            | 103 (8.3)                |

Abbreviations: SD: Standard Deviation; SBP: Systolic Blood Pressure; DBP: Diastolic Blood Pressure; BMI: Body mass index.

\* $P < 0.05$ ; \*\* $P < 0.01$ ; \*\*\* $P < 0.001$

**Supplementary Table 4. Characteristics of included and excluded participants of CLHLS (Chinese Longitudinal Healthy Longevity Survey)  $\geq 80$  years of age.**

| Characteristic                                    | Included participants<br>(n = 6,595) | Excluded participants<br>(n = 3,824) |
|---------------------------------------------------|--------------------------------------|--------------------------------------|
| *** Age, years, mean (SD)                         | 91.0 (7.5)                           | 94.7 (7.6)                           |
| Female, [n (%)]                                   | 3,701 (56.1)                         | 2,210 (57.8)                         |
| Marital status                                    |                                      |                                      |
| Currently married and living with spouse, [n (%)] | 1,700 (25.8)                         | 1,006 (26.3)                         |
| Education years, < 11 years, [n (%)]              | 5,269 (79.9)                         | 3,136 (82.0)                         |
| Current smoker, [n (%)]                           | 884 (13.4)                           | 558 (14.6)                           |
| Current drinker, [n (%)]                          | 871 (13.2)                           | 493 (12.9)                           |
| SBP, mmHg, mean (SD)                              | 140.5 (21.8)                         | 138.1 (22.5)                         |
| DBP, mmHg, mean (SD)                              | 78.8 (11.6)                          | 77.8 (12.1)                          |
| *** BMI categories, [n (%)]                       |                                      |                                      |
| Underweight                                       | 1,524 (23.1)                         | 812 (21.2)                           |
| Normal                                            | 3,884 (58.9)                         | 2,279 (59.6)                         |
| Overweight                                        | 923 (14.0)                           | 507 (13.3)                           |
| Obesity                                           | 264 (4.0)                            | 226 (5.9)                            |

Abbreviations: SD: standard deviation; SBP: systolic blood pressure; DBP: diastolic blood pressure; BMI: body mass index.

\*\*\* $P < 0.001$

**Supplementary Table 5. Odds ratios for falls associated with systolic blood pressure and diastolic blood pressure, stratified by frail status.**

| Frail status*                         | Systolic blood pressure, mmHg |                  |            |                  |                  | <i>p</i> -trend |           |
|---------------------------------------|-------------------------------|------------------|------------|------------------|------------------|-----------------|-----------|
|                                       | <110                          | 110–119          | 120–129    | 130–139          | ≥140             | linear          | quadratic |
| <b>OR** (95% CI)</b>                  |                               |                  |            |                  |                  |                 |           |
| Non-frail                             | 1.17 (0.78–1.75)              | 1.14 (0.82–1.57) | 1.00 (ref) | 0.96 (0.74–1.24) | 0.98 (0.78–1.24) | 1.00            | 0.38      |
| Frail                                 | 1.17 (0.69–1.99)              | 1.37 (0.89–2.11) | 1.00 (ref) | 1.56 (1.13–2.13) | 1.62 (1.22–2.16) | 0.01            | 0.75      |
| <b>Diastolic blood pressure, mmHg</b> |                               |                  |            |                  |                  |                 |           |
|                                       | <60                           | 60–69            | 70–79      | 80–89            | ≥90              |                 |           |
| <b>OR** (95% CI)</b>                  |                               |                  |            |                  |                  |                 |           |
| Non-frail                             | 1.34 (0.84–2.13)              | 1.30 (1.01–1.67) | 1.00 (ref) | 1.05 (0.85–1.28) | 1.00 (0.78–1.27) | 0.09            | 0.28      |
| Frail                                 | 0.82 (0.45–1.49)              | 1.03 (0.75–1.40) | 1.00 (ref) | 1.05 (0.82–1.33) | 0.97 (0.72–1.30) | 0.89            | 0.49      |

\*Non-frail: FI < 0.25; Frail: FI ≥ 0.25.

\*\*Adjusted for age, sex, education status, current smoking and drinking status, marriage status, education years and body mass index. Abbreviations: OR: Odds ratio; CI: Confidence interval.

**Supplementary Table 6. Odds ratios for severe falls associated with systolic blood pressure and diastolic blood pressure, stratified by frail status.**

| Frail status*                         | Systolic blood pressure, mmHg |                  |            |                  |                  | <i>p</i> -trend |           |
|---------------------------------------|-------------------------------|------------------|------------|------------------|------------------|-----------------|-----------|
|                                       | <110                          | 110–119          | 120–129    | 130–139          | ≥140             | linear          | quadratic |
| <b>OR** (95% CI)</b>                  |                               |                  |            |                  |                  |                 |           |
| Non-frail                             | 1.06 (0.58–1.93)              | 0.65 (0.37–1.14) | 1.00 (ref) | 0.79 (0.53–1.18) | 0.81 (0.57–1.14) | 0.55            | 0.86      |
| Frail                                 | 1.45 (0.69–3.07)              | 1.20 (0.62–2.33) | 1.00 (ref) | 1.54 (0.95–2.50) | 1.51 (0.97–2.35) | 0.25            | 0.66      |
| <b>Diastolic blood pressure, mmHg</b> |                               |                  |            |                  |                  |                 |           |
|                                       | <60                           | 60–69            | 70–79      | 80–89            | ≥90              |                 |           |
| <b>OR** (95% CI)</b>                  |                               |                  |            |                  |                  |                 |           |
| Non-frailty                           | 1.32 (0.66–2.66)              | 1.07 (0.71–1.60) | 1.00 (ref) | 0.89 (0.64–1.24) | 1.17 (0.81–1.68) | 0.93            | 0.14      |
| frailty                               | 0.80 (0.33–1.96)              | 0.81 (0.50–1.31) | 1.00 (ref) | 1.05 (0.73–1.50) | 0.89 (0.57–1.39) | 0.64            | 0.30      |

\*Non-frail: FI < 0.25; Frail: FI ≥ 0.25

\*\*Adjusted for age, sex, education status, current smoking and drinking status, marriage status, education years and body mass index. Abbreviations: OR: Odds ratio; CI: Confidence interval.
